# Supplementary material for: MEST mediates the impact of prenatal bisphenol A exposure on long-term body weight development
Source: PubMed Central journal article supplement (PMC5910578; doi:10.1186/s13148-018-0478-z), 2018-04-20
Supplement: 13148_2018_478_MOESM2_ESM.pdf [file 13148_2018_478_MOESM2_ESM.pdf]

chr7 (q32.2) 7p21.3 21.1 p15.3 7p14.3 7p14.1 1312.3 11.2 11.21 11.22 q11.23 7q21.11 q21.3 7q22.1 7q31.1 7q33 7q34 7q35 q36.1 36.3

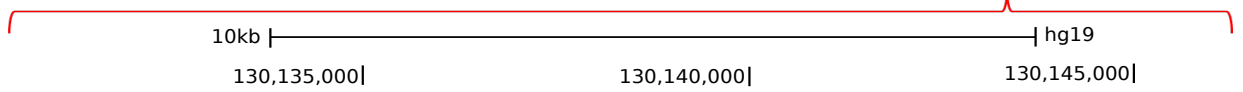

MEST

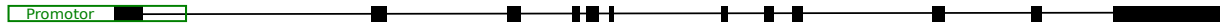

450k array CpG

| cg17580798

MassARRAY-amplicon

Chr7: 130,132,069-130,132,288  
3' CCCAGAGGCAGCCCCAGCTCGGACACGGGCACACAGTCCTCCGCTCGCCTGGCCCTAGT  
CCCAGGGCCGCCAGCCACACCCCTCGTTCCACCGCACACTCACCTGCGGAGGCGATCT  
CGGCGCACCATGGCCGCGTTATCCCATGCCGCCCGCCGCAGCGTTGCAGAGCACCGGGCG  
CCGCAGAGCCCGCAGCCGTGCAGAGCTGGCCAGCAGCGG' 5
